# Supplementary material for: Glucose Injection Into Yolk Positively Modulates Intermediary Metabolism and Growth Performance in Juvenile Nile Tilapia (Oreochromis niloticus)
Source: PubMed Central journal article supplement (PMC7181793; doi:10.3389/fphys.2020.00286), 2020-04-17
Supplement: Table_1.pdf [file Table_1.pdf]

**Supplementary Table S1.** List of tilapia primers used for qRT-PCR.

| Genes             | 5'/3' forward primer  | 5'/3' reverse primer  | Access number   |
|-------------------|-----------------------|-----------------------|-----------------|
| Reference gene    |                       |                       |                 |
| <i>ef1</i> *      | GCACGCTCTGCTGGCCTTT   | GCGCTCAATCTTCCATCCC   | <u>AB075952</u> |
| Liver metabolism  |                       |                       |                 |
| <i>gck</i>        | GGGTGGTAGGATTTGGTGTG  | TGCTGACACAAGGCATCTTC  | XM__003451020   |
| <i>pfklr</i>      | GACGAGCGAGTGGAGAAAAC  | TGTCTTGATCCGAGGGAATC  | XM__003447353   |
| <i>pklr</i>       | AGGTACAGGTCACCCGTCAG  | CATGTCGCCAGACTTGAAGA  | XM__005472622   |
| <i>g6pca1</i>     | AGCGTTAAGGCAACTGGAGA  | AAAAGCTAACAAGGCCAGCA  | XM__003448671   |
| <i>g6pca2</i>     | CTTCTTCCCCCTTTGGTTTC  | AGACTCCTGCAGCTCCCATA  | XM__013273429   |
| <i>pck1</i>       | AAGCTTTTGACTGGCAGCAT  | TGCTCAGCCAGTGAGAGAGA  | XM__003448375   |
| <i>pck2</i>       | TACGTCTTGAGCTCCCGTCT  | CCTCCTGGATGATGCAAGTT  | XM__019354843   |
| <i>fasn</i>       | AACCTGCTTCTCAAGCCAAA  | CGTCACCCCTTGTTCTTTGT  | XM__013276809   |
| <i>g6pd</i>       | GTCACCTCAACCGGAAGTA   | TGGCTGAGGACACCTCTCTT  | XM__013275693   |
| <i>asat</i>       | GCTTCCTTGGTGACTTGGAA  | CCAGGCATCTTTCTCCAGAC  | XM__003451918   |
| <i>alat</i>       | CACGGTGAAGAAGGTGGAGT  | GCAGTTCAGGGTAGGAGCAG  | XM__005476466   |
| <i>gdh</i>        | CGAGCGAGACTCCAACCTACC | TGGCTGTTCTCATGATTTGC  | XM__003457465   |
| Muscle metabolism |                       |                       |                 |
| <i>glut4</i>      | GAGGATGGACATGGAGAGGA  | CAGGAAAAGCGAGACTACCG  | JN900493        |
| <i>hk1</i>        | CGTCGCTTAGTCCCAGACTC  | TGACTGTAGCGTCCTTGTGG  | XM__019360229   |
| <i>hk2</i>        | CAGAGGGGAATTCGATTTGA  | CCCACCTCGACATTGACACAC | XM__003448615   |
| <i>pfkma</i>      | AGGACCTCCAACCAACTGTG  | TTTTCTCCTCCATCCACCAG  | XM__019349871   |
| <i>pfkmb</i>      | TTTGTGCATGAGGGTTACCA  | CACCTCCAATCACACACAGG  | XM__003441476   |
| <i>pkma</i>       | TGACTGCTTCCTGGTCTGTG  | CAGTGAAAGCTGGCAAATGA  | XM__005447626   |

\*From Yang et al. (2013).
